# Supplementary material for: High-accuracy first-principles-based rate coefficients for the reaction of OH and CH3OOH
Source: Royal Society of Chemistry journal article supplement (doi:10.1039/d2cp03919b), 2022-01-01
Supplement: d2cp03919b1.pdf [file d2cp03919b1.pdf]

## \*\*\*Supplementary Material\*\*\*

### High-Accuracy First-Principles-based Rate Coefficients for the Reaction of OH and CH<sub>3</sub>OOH

Thanh Lam Nguyen,<sup>1</sup> and Ajith Perera,<sup>1</sup>

<sup>1</sup>*Quantum Theory Project, Departments of Chemistry and Physics, University of Florida, Gainesville, FL. 32611, USA.*

Jozef Peeters<sup>2,\*</sup>

<sup>2</sup>*Department of Chemistry, University of Leuven, Celestijnenlaan 200F, B-3001 Leuven, Belgium.*

Corresponding authors: [jozef.peeters@kuleuven.be](mailto:jozef.peeters@kuleuven.be); [tlam.nguyen@chem.ufl.edu](mailto:tlam.nguyen@chem.ufl.edu)

Submitted to *Phys. Chem. Chem. Phys.*, on Aug. 24, 2022; Revised on Oct. 13, 2022.

#### Table of contents:

- Page 2 - 7 : Optimized geometries of intermediates, products and TSs  
Page 8 - 29 : Rovibrational data and anharmonic constants for various species  
Page 30 - 32 : Tables S1-S2: energies and rovibrational data for grid points along the barrierless association of OH and CH<sub>3</sub>OOH.  
Page 33 - 34 : Figs. S1, S2, and S3  
Page 35 - 49 : Figs. S4-S9, 1D-hindered internal treatments

Figures 1-3 and Table 1 can be found in the main text.

## Geometries of various species optimized at fc-CCSD(T)/aVTZ level of theory

### CH<sub>3</sub>OOH(C<sub>1</sub>, <sup>1</sup>A)

CH3OOH

C

H 1 B1\*

H 1 B2\* 2 A1\*

H 1 B3\* 2 A2\* 3 D1\*

O 1 B4\* 2 A3\* 4 D2\*

O 5 B5\* 1 A4\* 2 D3\*

H 6 B6\* 5 A5\* 1 D4\*

B1 = 1.091645197619005  
B2 = 1.093522963757435  
A1 = 110.132565261864912  
B3 = 1.092355356550471  
A2 = 110.013076468606712  
D1 = -121.508894255252287  
B4 = 1.420215165057833  
A3 = 104.643188247094528  
D2 = -118.924646619023164  
B5 = 1.460965686633438  
A4 = 105.263175973693833  
D3 = 177.113911395724614  
B6 = 0.967173702517603  
A5 = 99.773803333695767  
D4 = 116.580447413081416

### CH<sub>3</sub>OO(C<sub>s</sub>, <sup>2</sup>A')

CH3OO

O

O 1 R1\*

C 2 R2\* 1 A1\*

H 3 R3\* 2 A2\* 1 T180

H 3 R4\* 2 A3\* 4 T2\*

H 3 R4\* 2 A3\* 4 T3\*

R1 = 1.325044184105788  
R2 = 1.447180813090181  
A1 = 109.899561667711836  
R3 = 1.088914231377361  
A2 = 105.474592243366061  
T180 = 180.000000000000000  
R4 = 1.089117305766924  
A3 = 108.868966685897945  
T2 = 119.459327100774644

T3 = -119.459327100774644

**OH(C<sub>∞v</sub>, X<sup>2</sup>Π)**

OH: Optimized at CCSD(T)/AUG-PVTZ level

O  
H 1 B1\*

B1 = 0.973275224901106

**CH<sub>2</sub>O (C<sub>2v</sub>, X<sup>1</sup>A<sub>1</sub>)**

CH2O  
O  
C 1 R1\*  
H 2 R2\* 1 A1\*  
H 2 R2\* 1 A1\* 3 T180

R1 = 1.211515087382290  
R2 = 1.103061904375071  
A1 = 121.714028216910862  
T180 = 180.000000000000000

**H<sub>2</sub>O (C<sub>2v</sub>, X<sup>1</sup>A<sub>1</sub>)**

H2O  
O  
H 1 R1\*  
H 1 R1\* 2 A1\*

R1 = 0.961579640410436  
A1 = 104.179636130297880

**PRC-1(C<sub>1</sub>, <sup>2</sup>A)**

OH--CH3OOH  
C  
H 1 B1\*  
O 1 B2\* 2 A1\*  
O 3 B3\* 1 A2\* 2 D1\*  
H 4 B4\* 3 A3\* 1 D2\*  
O 3 B5\* 1 A4\* 4 D3\*  
H 6 B6\* 3 A5\* 1 D4\*  
H 1 B7\* 3 A6\* 4 D5\*  
H 1 B8\* 3 A7\* 4 D6\*

B1 = 1.091588727025372  
B2 = 1.424786496164878  
A1 = 104.809690296401882  
B3 = 1.460594085866826  
A2 = 105.550813493638614  
D1 = -177.194367084823654  
B4 = 0.972909743620295  
A3 = 99.864318044119159  
D2 = -114.214612072144945  
B5 = 2.805190587575620  
A4 = 121.181632132720864  
D3 = -88.028323497980665  
B6 = 0.980871267585947  
A5 = 27.475348465952969  
D4 = -92.817898790759102  
B7 = 1.091149139435444  
A6 = 110.184559758062875  
D5 = -58.692161211568447  
B8 = 1.093004827987438  
A7 = 110.966291912426527  
D6 = 63.624666037144401

### PRC-2(C<sub>1</sub>, <sup>2</sup>A)

OH--CH3OOH

C

H 1 B1\*

O 1 B2\* 2 A1\*

O 3 B3\* 1 A2\* 2 D1\*

H 4 B4\* 3 A3\* 1 D2\*

O 4 B5\* 3 A4\* 1 D3\*

H 6 B6\* 4 A5\* 3 D4\*

H 1 B7\* 3 A6\* 4 D5\*

H 1 B8\* 3 A7\* 4 D6\*

B1 = 1.0911074377  
B2 = 1.4249914953  
A1 = 104.1626488153  
B3 = 1.4587377444  
A2 = 106.1446377267  
D1 = 178.4357943291  
B4 = 0.9673745276  
A3 = 100.5661486211  
D2 = 110.8790351554  
B5 = 2.9328001571  
A4 = 119.7573105098  
D3 = -32.3232584276  
B6 = 0.9777384088  
A5 = 1.9429392061  
D4 = -144.3656268727

B7 = 1.0930696423  
A6 = 111.0617388840  
D5 = -62.9977002740  
B8 = 1.0917306290  
A7 = 110.9710521597  
D6 = 60.0002821117

### TS1a(C<sub>1</sub>, <sup>2</sup>A)

TS1a

C

H 1 B1\*

O 1 B2\* 2 A1\*

O 3 B3\* 1 A2\* 2 D1\*

H 4 B4\* 3 A3\* 1 D2\*

O 4 B5\* 3 A4\* 1 D3\*

H 6 B6\* 4 A5\* 3 D4\*

H 1 B7\* 3 A6\* 4 D5\*

H 1 B8\* 3 A7\* 4 D6\*

B1 = 1.090759695296664  
B2 = 1.427588668816066  
A1 = 104.831836223227569  
B3 = 1.421110557342773  
A2 = 107.176996020398533  
D1 = -177.729609865989403  
B4 = 1.037542852595872  
A3 = 103.561565707204338  
D2 = -72.067395452404725  
B5 = 2.366197147918492  
A4 = 100.931958300649313  
D3 = -87.099694549202340  
B6 = 0.972425005941957  
A5 = 91.4344449456041904  
D4 = -73.655255437308369  
B7 = 1.091437510895782  
A6 = 110.377613261548504  
D5 = -58.584158466653982  
B8 = 1.094387416103645  
A7 = 110.220232774968679  
D6 = 63.848121425168053

### TS1b(C<sub>1</sub>, <sup>2</sup>A)

TS1b

C

H 1 B1\*

O 1 B2\* 2 A1\*

O 3 B3\* 1 A2\* 2 D1\*

H 4 B4\* 3 A3\* 1 D2\*  
O 4 B5\* 3 A4\* 1 D3\*  
H 6 B6\* 4 A5\* 3 D4\*  
H 1 B7\* 3 A6\* 4 D5\*  
H 1 B8\* 3 A7\* 4 D6\*

B1 = 1.090760744297297  
B2 = 1.425782321874379  
A1 = 104.818210873633745  
B3 = 1.419301882709666  
A2 = 106.616913772766480  
D1 = 176.920868744479009  
B4 = 1.046791597000261  
A3 = 102.892293677782206  
D2 = 102.374250889587628  
B5 = 2.294592489421196  
A4 = 102.674523897511037  
D3 = 80.854848582945166  
B6 = 0.971823001651056  
A5 = 94.185549088020949  
D4 = -137.584651793234116  
B7 = 1.094128086603258  
A6 = 109.666175451931096  
D5 = -64.442850351650577  
B8 = 1.091734145654033  
A7 = 110.471570752421897  
D6 = 57.782623025712390

### TS2a(C<sub>1</sub>, <sup>2</sup>A)

TS2

C

H 1 B1\*  
O 1 B2\* 2 A1\*  
O 3 B3\* 1 A2\* 2 D1\*  
H 4 B4\* 3 A3\* 1 D2\*  
O 1 B5\* 3 A4\* 4 D3\*  
H 6 B6\* 1 A5\* 3 D4\*  
H 1 B7\* 3 A6\* 4 D5\*  
H 1 B8\* 3 A7\* 4 D6\*

B1 = 1.090556226079533  
B2 = 1.392877437764292  
A1 = 107.310149375369889  
B3 = 1.453894719002093  
A2 = 105.957934156330126  
D1 = 179.403959922730792  
B4 = 0.977568422200095  
A3 = 99.847753100889292

D2 = 67.257672151334788  
 B5 = 2.562625242008479  
 A4 = 92.241076556335969  
 D3 = -59.687011094884589  
 B6 = 0.973805408679551  
 A5 = 92.849404617052684  
 D4 = -74.344602695792204  
 B7 = 1.170528880361910  
 A6 = 108.327256364727546  
 D5 = -62.765258443787481  
 B8 = 1.092690561652747  
 A7 = 112.848555772302234  
 D6 = 53.578284972300807

### TS2b(C<sub>1</sub>, <sup>2</sup>A)

TS2b

C

H 1 B1\*  
 O 1 B2\* 2 A1\*  
 O 3 B3\* 1 A2\* 2 D1\*  
 H 4 B4\* 3 A3\* 1 D2\*  
 O 1 B5\* 3 A4\* 4 D3\*  
 H 6 B6\* 1 A5\* 3 D4\*  
 H 1 B7\* 3 A6\* 4 D5\*  
 H 1 B8\* 3 A7\* 4 D6\*

B1 = 1.090849359532236  
 B2 = 1.392529794755667  
 A1 = 107.199172091191528  
 B3 = 1.453249053853418  
 A2 = 106.094734756239987  
 D1 = 179.081795611584823  
 B4 = 0.976799991099919  
 A3 = 99.632113259533966  
 D2 = 70.508021140371014  
 B5 = 2.569720062525119  
 A4 = 93.906487589899044  
 D3 = -56.818096505047023  
 B6 = 0.973409249110573  
 A5 = 98.078140440412085  
 D4 = 130.005358661229167  
 B7 = 1.169102238917989  
 A6 = 107.503224941745927  
 D5 = -65.242892398731286  
 B8 = 1.092312930043115  
 A7 = 112.748971347270853  
 D6 = 53.530146374382383

## Ro-vibrational parameters and anharmonic constants for relevant species

### CH<sub>3</sub>OOH

| Har. vib. frequencies                    | CCSD(T)/aVTZ |
|------------------------------------------|--------------|
| Vib (1DHR)                               | 185.2673     |
| Vib (1DHR)                               | 252.7168     |
| vib                                      | 444.0688     |
| vib                                      | 848.9585     |
| vib                                      | 1048.3839    |
| vib                                      | 1173.5470    |
| vib                                      | 1206.8179    |
| vib                                      | 1359.9221    |
| vib                                      | 1456.3420    |
| vib                                      | 1479.1789    |
| vib                                      | 1520.2682    |
| vib                                      | 3022.3930    |
| vib                                      | 3099.9745    |
| vib                                      | 3126.9426    |
| vib                                      | 3769.7714    |
| Rotational constants (cm <sup>-1</sup> ) |              |
| A=                                       | 1.41209      |
| B=                                       | 0.35026      |
| C=                                       | 0.30388      |

### Anharmonic constants (cm<sup>-1</sup>)

|      |          |
|------|----------|
| 7 7  | -27.5146 |
| 7 8  | -4.2606  |
| 7 9  | -1.1840  |
| 7 10 | -1.4782  |
| 7 11 | 6.0200   |
| 7 12 | 1.2585   |
| 7 13 | 4.9029   |
| 7 14 | 5.1206   |
| 7 15 | -0.0456  |
| 7 16 | -1.0156  |
| 7 17 | 1.0797   |
| 7 18 | 0.2089   |
| 7 19 | -1.9400  |
| 7 20 | 1.7036   |
| 7 21 | 1.7391   |
| 8 8  | -5.5353  |
| 8 9  | -1.5882  |



|       |          |
|-------|----------|
| 8 10  | -1.3973  |
| 8 11  | 0.3471   |
| 8 12  | -1.6770  |
| 8 13  | -5.6941  |
| 8 14  | -0.3632  |
| 8 15  | 2.0285   |
| 8 16  | 3.0763   |
| 8 17  | -1.9972  |
| 8 18  | 0.7098   |
| 8 19  | 1.9303   |
| 8 20  | -1.4129  |
| 8 21  | 0.1646   |
| 9 9   | 0.2516   |
| 9 10  | -4.8359  |
| 9 11  | -4.7736  |
| 9 12  | 0.4703   |
| 9 13  | -1.7467  |
| 9 14  | -1.6290  |
| 9 15  | -0.4766  |
| 9 16  | -0.8040  |
| 9 17  | 0.2419   |
| 9 18  | 0.1704   |
| 9 19  | 0.5264   |
| 9 20  | -0.7403  |
| 9 21  | 0.5482   |
| 10 10 | -6.1248  |
| 10 11 | -5.5537  |
| 10 12 | -0.3760  |
| 10 13 | -3.0002  |
| 10 14 | -14.3598 |
| 10 15 | -1.2432  |
| 10 16 | -1.0516  |
| 10 17 | -0.4461  |
| 10 18 | -0.1246  |
| 10 19 | 0.3898   |
| 10 20 | -1.5278  |
| 10 21 | -1.7237  |
| 11 11 | -7.4284  |
| 11 12 | -8.7352  |
| 11 13 | -8.9616  |
| 11 14 | -3.9528  |
| 11 15 | -6.9938  |
| 11 16 | -2.6074  |
| 11 17 | -2.9272  |
| 11 18 | 1.3104   |
| 11 19 | 4.0600   |
| 11 20 | -0.6316  |
| 11 21 | -1.7847  |
| 12 12 | -1.7468  |
| 12 13 | -0.2984  |
| 12 14 | -1.1009  |

|       |          |
|-------|----------|
| 12 15 | -2.2776  |
| 12 16 | -6.0474  |
| 12 17 | -10.1011 |
| 12 18 | -4.4654  |
| 12 19 | -4.0118  |
| 12 20 | -3.4025  |
| 12 21 | -0.4574  |
| 13 13 | -2.4341  |
| 13 14 | -15.5536 |
| 13 15 | -8.3404  |
| 13 16 | -2.4139  |
| 13 17 | -3.2340  |
| 13 18 | -3.4301  |
| 13 19 | -3.6347  |
| 13 20 | -5.7550  |
| 13 21 | 0.1504   |
| 14 14 | -10.4267 |
| 14 15 | -1.0994  |
| 14 16 | -0.7334  |
| 14 17 | -0.8862  |
| 14 18 | 0.1606   |
| 14 19 | 0.7995   |
| 14 20 | -0.6376  |
| 14 21 | -28.3700 |
| 15 15 | -7.9130  |
| 15 16 | -3.5589  |
| 15 17 | -3.3054  |
| 15 18 | 12.9828  |
| 15 19 | -7.7323  |
| 15 20 | -14.4466 |
| 15 21 | -0.1412  |
| 16 16 | -5.8894  |
| 16 17 | -3.8691  |
| 16 18 | -6.9340  |
| 16 19 | -12.0813 |
| 16 20 | -19.4613 |
| 16 21 | 0.0292   |
| 17 17 | -15.1221 |
| 17 18 | 31.1447  |
| 17 19 | -18.9250 |
| 17 20 | -5.6942  |
| 17 21 | -0.4367  |
| 18 18 | -21.5691 |
| 18 19 | -97.7506 |
| 18 20 | -61.3893 |
| 18 21 | -0.8875  |
| 19 19 | -33.7076 |
| 19 20 | -38.7018 |
| 19 21 | -0.9452  |
| 20 20 | -39.8475 |
| 20 21 | -0.4482  |

21 21 -93.4546

### PRC-1

Rotationally projected vibrational frequencies (cm<sup>-1</sup>, at CCSD(T)/aVTZ)

|    |           |
|----|-----------|
| 7  | 49.0456   |
| 8  | 129.9006  |
| 9  | 182.4594  |
| 10 | 251.5371  |
| 11 | 273.1338  |
| 12 | 383.2561  |
| 13 | 443.4460  |
| 14 | 588.6770  |
| 15 | 850.0265  |
| 16 | 1045.2506 |
| 17 | 1177.6138 |
| 18 | 1208.9177 |
| 19 | 1438.0952 |
| 20 | 1457.4721 |
| 21 | 1479.7800 |
| 22 | 1521.0606 |
| 23 | 3028.8062 |
| 24 | 3112.5723 |
| 25 | 3132.6765 |
| 26 | 3591.3432 |
| 27 | 3683.9091 |

Zero-point energy: 41.4990 kcal/mol = 173.6319 kJ/mol = 14514.490 cm<sup>-1</sup>

Rotational constants (in cm<sup>-1</sup>):

0.1049922518      0.1283707650      0.3780107547

### PRC-2

Rotationally projected vibrational frequencies (cm<sup>-1</sup>, at fc-CCSD(T)/aVDZ)

|    |           |
|----|-----------|
| 7  | 50.3588   |
| 8  | 68.3616   |
| 9  | 143.1047  |
| 10 | 233.2623  |
| 11 | 280.2010  |
| 12 | 398.7313  |
| 13 | 436.2215  |
| 14 | 548.1124  |
| 15 | 800.3864  |
| 16 | 1010.1470 |
| 17 | 1153.6695 |
| 18 | 1189.7119 |
| 19 | 1341.6668 |
| 20 | 1431.7529 |

|    |           |
|----|-----------|
| 21 | 1453.3737 |
| 22 | 1479.4348 |
| 23 | 3016.6121 |
| 24 | 3108.8258 |
| 25 | 3131.5503 |
| 26 | 3601.1681 |
| 27 | 3739.1493 |

Zero-point energy: 40.9083 kcal/mol = 171.1606 kJ/mol = 14307.901 cm<sup>-1</sup>

Rotational constants (in cm<sup>-1</sup>):

|              |              |              |
|--------------|--------------|--------------|
| 0.0880044941 | 0.1098088404 | 0.3703350008 |
|--------------|--------------|--------------|

### TS1a

*As shown below in Fig. S7 transition state TS1 has two minima, with distinct vibrational frequencies. The lower minimum is designated here as TS1b, while the higher, secondary minimum as TS1a. Similar for transition state TS2.*

| Har. vib. frequencies | CCSD(T)/aVTZ |
|-----------------------|--------------|
| IMAG                  | 1196.1286i   |
| Vib (1DHR)            | 86.3854      |
| vib                   | 123.9071     |
| vib                   | 228.6799     |
| vib                   | 284.0348     |
| vib                   | 369.3336     |
| vib                   | 468.8965     |
| vib                   | 686.3552     |
| vib                   | 894.1869     |
| vib                   | 1043.6341    |
| vib                   | 1170.0918    |
| vib                   | 1205.8553    |
| vib                   | 1449.6554    |
| vib                   | 1453.7220    |
| vib                   | 1483.5884    |
| vib                   | 1511.1097    |
| vib                   | 1752.3858    |
| vib                   | 3022.7578    |
| vib                   | 3106.5456    |
| vib                   | 3138.6764    |
| vib                   | 3738.4171    |

| Rotational constants (cm <sup>-1</sup> ) |        |
|------------------------------------------|--------|
| A=                                       | 0.4419 |
| B=                                       | 0.1342 |
| C=                                       | 0.1165 |

### TS1b

As shown below in Fig. S7 transition state TS1 has two minima, with distinct vibrational frequencies. The lower minimum is designated here as TS1b, while the higher, secondary minimum as TS1a. Similar for transition state TS2.

| Har. vib. frequencies                    | CCSD(T)/aVTZ |
|------------------------------------------|--------------|
| IMAG                                     | 1503.0361i   |
| Vib (1DHR)                               | 89.1983      |
| vib                                      | 169.9031     |
| vib                                      | 222.7990     |
| vib                                      | 268.2715     |
| vib                                      | 358.5662     |
| vib                                      | 467.4197     |
| vib                                      | 738.7049     |
| vib                                      | 899.7550     |
| vib                                      | 1043.1380    |
| vib                                      | 1168.5814    |
| vib                                      | 1209.6346    |
| vib                                      | 1346.5379    |
| vib                                      | 1449.2306    |
| vib                                      | 1478.8460    |
| vib                                      | 1512.3987    |
| Vib (a)                                  | 1869.5046    |
| vib                                      | 3021.9190    |
| vib                                      | 3105.8661    |
| vib                                      | 3138.1008    |
| vib                                      | 3742.8003    |
| Rotational constants (cm <sup>-1</sup> ) |              |
| A=                                       | 0.43499      |
| B=                                       | 0.14131      |
| C=                                       | 0.11986      |

<sup>a)</sup> This mode, corresponding to the CH<sub>3</sub>OO–H stretch in TS1, has unreliable anharmonic constants and is therefore treated separately as a harmonic oscillator.

Anharmonic constants ( $\text{cm}^{-1}$ )

|      |             |
|------|-------------|
| 7 7  | -570.1225   |
| 7 8  | 9.7698i     |
| 7 9  | 19.4326i    |
| 7 10 | -9.2519i    |
| 7 11 | 12.7818i    |
| 7 12 | 113.9518i   |
| 7 13 | 10.8067i    |
| 7 14 | 168.8305i   |
| 7 15 | 30.3857i    |
| 7 16 | 0.4130i     |
| 7 17 | -2.4092i    |
| 7 18 | -0.2580i    |
| 7 19 | -117.5624i  |
| 7 20 | -2.5453i    |
| 7 21 | 0.0912i     |
| 7 22 | -3.8227i    |
| 7 23 | -1184.9443i |
| 7 24 | 4.8709i     |
| 7 25 | 9.1645i     |
| 7 26 | 9.3313i     |
| 7 27 | 24.7372i    |
| 8 8  | -1.8165     |
| 8 9  | -1.7176     |
| 8 10 | -5.6368     |
| 8 11 | -2.4430     |
| 8 12 | 2.4375      |
| 8 13 | -2.1515     |
| 8 14 | -0.0093     |
| 8 15 | 0.3469      |
| 8 16 | 0.2795      |
| 8 17 | -0.1687     |
| 8 18 | -0.5624     |
| 8 19 | -10.9554    |
| 8 20 | 0.5510      |
| 8 21 | 0.1381      |
| 8 22 | 0.1270      |
| 8 23 | 3.6183      |
| 8 24 | 1.3033      |
| 8 25 | 1.1405      |
| 8 26 | 0.2003      |
| 8 27 | 0.6190      |
| 9 9  | -0.8859     |
| 9 10 | -4.2470     |
| 9 11 | -3.9573     |
| 9 12 | -1.4109     |
| 9 13 | 0.9837      |
| 9 14 | -0.7164     |

|       |          |
|-------|----------|
| 9 15  | -0.9294  |
| 9 16  | -0.4100  |
| 9 17  | -0.2925  |
| 9 18  | -0.3987  |
| 9 19  | -15.0926 |
| 9 20  | 0.1494   |
| 9 21  | 0.1047   |
| 9 22  | -1.1069  |
| 9 23  | -2.4241  |
| 9 24  | 0.1727   |
| 9 25  | 0.2351   |
| 9 26  | -0.2938  |
| 9 27  | -0.1152  |
| 10 10 | -11.7133 |
| 10 11 | -2.2284  |
| 10 12 | -1.1155  |
| 10 13 | -1.8630  |
| 10 14 | -1.8181  |
| 10 15 | -0.4834  |
| 10 16 | 0.0116   |
| 10 17 | -1.4742  |
| 10 18 | -0.4533  |
| 10 19 | -44.9791 |
| 10 20 | -0.0190  |
| 10 21 | 0.1010   |
| 10 22 | -1.2129  |
| 10 23 | 9.0203   |
| 10 24 | -0.0264  |
| 10 25 | -0.6332  |
| 10 26 | 0.3926   |
| 10 27 | -2.3939  |
| 11 11 | -3.8993  |
| 11 12 | 0.3076   |
| 11 13 | 3.4202   |
| 11 14 | -0.0644  |
| 11 15 | -0.9776  |
| 11 16 | 0.0186   |
| 11 17 | -0.6925  |
| 11 18 | -2.9179  |
| 11 19 | -19.7509 |
| 11 20 | 1.3259   |
| 11 21 | 0.5207   |
| 11 22 | -2.2407  |
| 11 23 | 19.8953  |
| 11 24 | 1.0872   |
| 11 25 | 1.9520   |
| 11 26 | -1.2036  |
| 11 27 | 0.1179   |
| 12 12 | 11.3101  |
| 12 13 | 1.6483   |
| 12 14 | 12.0614  |

|       |          |
|-------|----------|
| 12 15 | 9.7524   |
| 12 16 | 1.7196   |
| 12 17 | -0.3754  |
| 12 18 | -0.2534  |
| 12 19 | -11.5401 |
| 12 20 | -0.8229  |
| 12 21 | -0.2381  |
| 12 22 | -0.3095  |
| 12 23 | -20.0553 |
| 12 24 | 0.4049   |
| 12 25 | 0.9562   |
| 12 26 | 0.9253   |
| 12 27 | 3.3708   |
| 13 13 | -0.0112  |
| 13 14 | -0.0997  |
| 13 15 | -4.0572  |
| 13 16 | -4.4280  |
| 13 17 | 0.2847   |
| 13 18 | -1.3829  |
| 13 19 | -4.3711  |
| 13 20 | 0.0446   |
| 13 21 | -0.6977  |
| 13 22 | -0.9120  |
| 13 23 | -2.2510  |
| 13 24 | 0.4812   |
| 13 25 | 0.7566   |
| 13 26 | -0.6182  |
| 13 27 | 0.3371   |
| 14 14 | 4.7790   |
| 14 15 | 3.2058   |
| 14 16 | -0.4887  |
| 14 17 | -0.5212  |
| 14 18 | -0.3660  |
| 14 19 | -8.5956  |
| 14 20 | -0.1703  |
| 14 21 | -0.0704  |
| 14 22 | -0.5247  |
| 14 23 | -42.0855 |
| 14 24 | 0.6145   |
| 14 25 | 1.1496   |
| 14 26 | 1.0032   |
| 14 27 | -8.8035  |
| 15 15 | -6.2709  |
| 15 16 | -9.9544  |
| 15 17 | -1.2828  |
| 15 18 | -2.6372  |
| 15 19 | -8.2207  |
| 15 20 | -1.6843  |
| 15 21 | -0.9571  |
| 15 22 | -0.4690  |
| 15 23 | 3.6707   |



|       |          |
|-------|----------|
| 15 24 | 0.4022   |
| 15 25 | 0.8436   |
| 15 26 | -1.2800  |
| 15 27 | 0.5077   |
| 16 16 | -7.5521  |
| 16 17 | -7.9619  |
| 16 18 | -8.3802  |
| 16 19 | -4.8230  |
| 16 20 | -6.8087  |
| 16 21 | -2.6072  |
| 16 22 | -3.0377  |
| 16 23 | 0.6861   |
| 16 24 | 1.4808   |
| 16 25 | 3.7261   |
| 16 26 | -0.3958  |
| 16 27 | 0.1934   |
| 17 17 | -1.8068  |
| 17 18 | -0.5992  |
| 17 19 | -1.5894  |
| 17 20 | -4.0449  |
| 17 21 | -5.9478  |
| 17 22 | -8.6379  |
| 17 23 | 1.2745   |
| 17 24 | -5.5353  |
| 17 25 | -4.8065  |
| 17 26 | -3.1508  |
| 17 27 | 0.1333   |
| 18 18 | -2.1673  |
| 18 19 | -1.5387  |
| 18 20 | -7.0431  |
| 18 21 | -4.8550  |
| 18 22 | -4.6911  |
| 18 23 | 1.3110   |
| 18 24 | -3.4039  |
| 18 25 | -4.4436  |
| 18 26 | -6.5041  |
| 18 27 | -0.0071  |
| 19 19 | -46.6985 |
| 19 20 | -0.6814  |
| 19 21 | -0.3094  |
| 19 22 | -0.3282  |
| 19 23 | 101.6839 |
| 19 24 | -0.8405  |
| 19 25 | -1.5146  |
| 19 26 | -1.4352  |
| 19 27 | 2.2920   |
| 20 20 | -7.1007  |
| 20 21 | -2.9562  |
| 20 22 | -2.7450  |
| 20 23 | -0.2684  |
| 20 24 | 9.7178   |

|       |          |
|-------|----------|
| 20 25 | -8.2793  |
| 20 26 | -12.7625 |
| 20 27 | -0.0594  |
| 21 21 | -5.7537  |
| 21 22 | -4.3842  |
| 21 23 | -0.8912  |
| 21 24 | -6.9629  |
| 21 25 | -11.9005 |
| 21 26 | -20.1433 |
| 21 27 | -0.0406  |
| 22 22 | -1.7677  |
| 22 23 | 1.1069   |
| 22 24 | -22.6399 |
| 22 25 | -19.4397 |
| 22 26 | -7.7786  |
| 22 27 | 0.0245   |
| 23 23 | 56.9173  |
| 23 24 | -5.9523  |
| 23 25 | -7.5890  |
| 23 26 | -5.9791  |
| 23 27 | -23.3399 |
| 24 24 | -22.6566 |
| 24 25 | -97.5543 |
| 24 26 | -55.3814 |
| 24 27 | 0.0096   |
| 25 25 | -32.4463 |
| 25 26 | -40.1600 |
| 25 27 | 0.1041   |
| 26 26 | -40.4974 |
| 26 27 | 0.0253   |
| 27 27 | -86.6730 |

## TS2b

Har. Vib. frequencies

IMAG

vib

vib

vib (1DHR)

vib

vib

vib

vib

vib

vib

vib

vib

CCSD(T)/aVTZ

779.4271i

143.3570

166.8299

261.1231

382.3244

446.5961

546.0607

753.2441

852.4799

910.3131

1092.3906

1196.4375

|                                          |           |
|------------------------------------------|-----------|
| vib                                      | 1335.4111 |
| vib                                      | 1427.4584 |
| vib                                      | 1438.2994 |
| vib                                      | 1469.7532 |
| Vib (a)                                  | 1740.3137 |
| vib                                      | 3055.3688 |
| vib                                      | 3148.3688 |
| vib                                      | 3597.6155 |
| vib                                      | 3713.4027 |
| Rotational constants (cm <sup>-1</sup> ) |           |
| A                                        | 0.3326    |
| B                                        | 0.1684    |
| C                                        | 0.1252    |

a) This mode, corresponding to the H-CH<sub>2</sub>OOH stretch in TS2, has unreliable anharmonic constants and is therefore treated separately as a harmonic oscillator.

#### Anharmonic constants (cm<sup>-1</sup>)

|      |            |
|------|------------|
| 7 7  | -94.7788   |
| 7 8  | -13.9486i  |
| 7 9  | 42.4687i   |
| 7 10 | 5.9780i    |
| 7 11 | 64.9522i   |
| 7 12 | 26.0258i   |
| 7 13 | 20.6090i   |
| 7 14 | 120.5213i  |
| 7 15 | 2.4061i    |
| 7 16 | -6.1086i   |
| 7 17 | 19.5110i   |
| 7 18 | -3.0600i   |
| 7 19 | -64.1188i  |
| 7 20 | -30.2283i  |
| 7 21 | -23.3003i  |
| 7 22 | 4.7870i    |
| 7 23 | -912.4041i |
| 7 24 | -5.2155i   |
| 7 25 | 12.1373i   |
| 7 26 | -41.3338i  |
| 7 27 | 14.2133i   |
| 8 8  | -6.7390    |
| 8 9  | -4.7613    |
| 8 10 | -10.8462   |
| 8 11 | -4.1404    |
| 8 12 | 1.1381     |
| 8 13 | -34.8326   |
| 8 14 | 9.9308     |

|       |          |
|-------|----------|
| 8 15  | -0.0121  |
| 8 16  | 9.7180   |
| 8 17  | -1.1459  |
| 8 18  | 1.7272   |
| 8 19  | 6.4450   |
| 8 20  | -6.2482  |
| 8 21  | -0.9057  |
| 8 22  | -5.9426  |
| 8 23  | -34.7591 |
| 8 24  | 0.5065   |
| 8 25  | -0.3579  |
| 8 26  | 15.9899  |
| 8 27  | 1.4197   |
| 9 9   | -0.5678  |
| 9 10  | -0.4194  |
| 9 11  | 0.7416   |
| 9 12  | 2.0899   |
| 9 13  | -9.8603  |
| 9 14  | -0.4962  |
| 9 15  | -0.4400  |
| 9 16  | -1.8225  |
| 9 17  | -0.1902  |
| 9 18  | -3.4956  |
| 9 19  | -7.3298  |
| 9 20  | -1.3519  |
| 9 21  | -27.4528 |
| 9 22  | -1.8078  |
| 9 23  | 2.2824   |
| 9 24  | 0.8359   |
| 9 25  | 1.2731   |
| 9 26  | 4.5793   |
| 9 27  | 0.3041   |
| 10 10 | -5.5602  |
| 10 11 | -11.4443 |
| 10 12 | -0.6030  |
| 10 13 | -27.4167 |
| 10 14 | 7.5084   |
| 10 15 | -0.1855  |
| 10 16 | -0.0825  |
| 10 17 | 0.1592   |
| 10 18 | -0.2638  |
| 10 19 | -0.4222  |
| 10 20 | -2.3008  |
| 10 21 | -3.4866  |
| 10 22 | -5.4819  |
| 10 23 | -11.1577 |
| 10 24 | -0.1716  |
| 10 25 | -0.1404  |
| 10 26 | 19.2618  |
| 10 27 | -2.3412  |
| 11 11 | -6.4162  |

|       |          |
|-------|----------|
| 11 12 | -3.3241  |
| 11 13 | -9.3061  |
| 11 14 | 0.8697   |
| 11 15 | -0.2178  |
| 11 16 | 14.9055  |
| 11 17 | 0.6169   |
| 11 18 | -4.1770  |
| 11 19 | 2.0721   |
| 11 20 | -0.6449  |
| 11 21 | -0.4161  |
| 11 22 | 3.7537   |
| 11 23 | -35.9420 |
| 11 24 | -0.6410  |
| 11 25 | -1.3083  |
| 11 26 | 7.2358   |
| 11 27 | 1.1760   |
| 12 12 | -0.9331  |
| 12 13 | -1.1087  |
| 12 14 | -8.5477  |
| 12 15 | -3.5209  |
| 12 16 | -11.8785 |
| 12 17 | -1.5872  |
| 12 18 | -1.1819  |
| 12 19 | -2.9675  |
| 12 20 | 5.5959   |
| 12 21 | 0.7867   |
| 12 22 | 0.0078   |
| 12 23 | 16.9015  |
| 12 24 | 0.2800   |
| 12 25 | -0.2568  |
| 12 26 | -0.9344  |
| 12 27 | -0.3665  |
| 13 13 | -56.4295 |
| 13 14 | 7.0189   |
| 13 15 | -0.5472  |
| 13 16 | 2.0276   |
| 13 17 | -2.3868  |
| 13 18 | 2.7876   |
| 13 19 | 1.6762   |
| 13 20 | -4.6478  |
| 13 21 | -0.3688  |
| 13 22 | -13.8226 |
| 13 23 | -65.9856 |
| 13 24 | 0.1716   |
| 13 25 | -0.5484  |
| 13 26 | 66.3777  |
| 13 27 | 2.4171   |
| 14 14 | -7.3504  |
| 14 15 | -1.2013  |
| 14 16 | 58.5501  |
| 14 17 | -0.0149  |

|       |          |
|-------|----------|
| 14 18 | -1.0566  |
| 14 19 | 0.0611   |
| 14 20 | 3.0081   |
| 14 21 | 4.7765   |
| 14 22 | 2.5277   |
| 14 23 | 91.8977  |
| 14 24 | 0.7325   |
| 14 25 | 0.3061   |
| 14 26 | -7.1997  |
| 14 27 | -8.3925  |
| 15 15 | -1.6351  |
| 15 16 | -1.5746  |
| 15 17 | -2.3663  |
| 15 18 | -1.5804  |
| 15 19 | -1.2882  |
| 15 20 | -4.6473  |
| 15 21 | -1.6975  |
| 15 22 | -7.7210  |
| 15 23 | -1.4131  |
| 15 24 | -0.5582  |
| 15 25 | -1.3577  |
| 15 26 | -2.3000  |
| 15 27 | -0.1789  |
| 16 16 | 4.2842   |
| 16 17 | -3.1544  |
| 16 18 | 7.7929   |
| 16 19 | 34.5367  |
| 16 20 | 6.8147   |
| 16 21 | -2.9188  |
| 16 22 | -5.4602  |
| 16 23 | 212.3493 |
| 16 24 | 1.0750   |
| 16 25 | -3.1449  |
| 16 26 | 5.2637   |
| 16 27 | -7.0885  |
| 17 17 | -7.0063  |
| 17 18 | -6.4639  |
| 17 19 | -7.1673  |
| 17 20 | -4.9494  |
| 17 21 | -4.4582  |
| 17 22 | -4.2835  |
| 17 23 | -21.6471 |
| 17 24 | -0.7548  |
| 17 25 | -2.9984  |
| 17 26 | 3.0048   |
| 17 27 | 0.3126   |
| 18 18 | -1.8372  |
| 18 19 | -5.6001  |
| 18 20 | -5.6103  |
| 18 21 | -4.2722  |
| 18 22 | -1.4792  |

|       |           |
|-------|-----------|
| 18 23 | 5.5112    |
| 18 24 | -8.9323   |
| 18 25 | -5.7519   |
| 18 26 | -2.0020   |
| 18 27 | -0.4197   |
| 19 19 | -1.5336   |
| 19 20 | 1.0106    |
| 19 21 | -3.8097   |
| 19 22 | 0.8647    |
| 19 23 | 78.0773   |
| 19 24 | -2.2474   |
| 19 25 | -15.1003  |
| 19 26 | -0.3758   |
| 19 27 | -2.2201   |
| 20 20 | -4.0740   |
| 20 21 | -7.6242   |
| 20 22 | -16.9571  |
| 20 23 | 18.1432   |
| 20 24 | -5.8399   |
| 20 25 | -13.1709  |
| 20 26 | -0.6608   |
| 20 27 | -0.1611   |
| 21 21 | -4.1068   |
| 21 22 | -6.4353   |
| 21 23 | -0.2539   |
| 21 24 | -3.7394   |
| 21 25 | -5.3497   |
| 21 26 | -1.5261   |
| 21 27 | -1.1605   |
| 22 22 | -6.7022   |
| 22 23 | -25.5345  |
| 22 24 | -4.2758   |
| 22 25 | -8.2389   |
| 22 26 | 0.5963    |
| 22 27 | 0.0808    |
| 23 23 | 171.9785  |
| 23 24 | -0.0040   |
| 23 25 | -8.6426   |
| 23 26 | 61.6485   |
| 23 27 | -12.6893  |
| 24 24 | -35.3712  |
| 24 25 | -110.6131 |
| 24 26 | -0.9934   |
| 24 27 | 0.0779    |
| 25 25 | -38.2354  |
| 25 26 | -0.6131   |
| 25 27 | 0.2471    |
| 26 26 | -118.0476 |
| 26 27 | -3.4634   |
| 27 27 | -87.3595  |

## TS2a

| Har. Vib. frequencies                    | CCSD(T)/aVTZ |
|------------------------------------------|--------------|
| IMAG                                     | 756.2618i    |
| vib                                      | 140.5286     |
| vib                                      | 173.9947     |
| vib (1DHR)                               | 250.5207     |
| vib                                      | 358.9616     |
| vib                                      | 439.6146     |
| vib                                      | 510.0320     |
| vib                                      | 757.1732     |
| vib                                      | 853.1157     |
| vib                                      | 907.7255     |
| vib                                      | 1090.9565    |
| vib                                      | 1196.7926    |
| vib                                      | 1344.2711    |
| vib                                      | 1415.6175    |
| vib                                      | 1440.8948    |
| vib                                      | 1460.6680    |
| vib (a)                                  | 1750.8745    |
| vib                                      | 3055.9441    |
| vib                                      | 3146.6559    |
| vib                                      | 3612.5218    |
| vib                                      | 3718.0126    |
| Rotational constants (cm <sup>-1</sup> ) |              |
| A                                        | 0.33588      |
| B                                        | 0.16571      |
| C                                        | 0.12273      |

a) This mode, corresponding to the H-CH<sub>2</sub>OOH stretch in TS2, has unreliable anharmonic constants and is therefore treated separately as a harmonic oscillator

## Anharmonic constants (cm-1)

|      |           |
|------|-----------|
| 7 7  | -118.5688 |
| 7 8  | -10.6667i |
| 7 9  | 46.2924i  |
| 7 10 | 24.8250i  |
| 7 11 | 96.4394i  |
| 7 12 | 17.3963i  |
| 7 13 | 23.3338i  |
| 7 14 | 163.2716i |



|      |            |
|------|------------|
| 7 15 | -1.6721i   |
| 7 16 | -90.6746i  |
| 7 17 | 17.6839i   |
| 7 18 | 5.4862i    |
| 7 19 | -54.1304i  |
| 7 20 | -25.8624i  |
| 7 21 | -21.8643i  |
| 7 22 | 11.3981i   |
| 7 23 | -978.9088i |
| 7 24 | -1.1128i   |
| 7 25 | 14.5294i   |
| 7 26 | -45.3860i  |
| 7 27 | 14.6210i   |
| 8 8  | -6.3258    |
| 8 9  | -6.0077    |
| 8 10 | -15.5903   |
| 8 11 | 0.2450     |
| 8 12 | -2.8258    |
| 8 13 | -28.1368   |
| 8 14 | 2.5601     |
| 8 15 | 0.0845     |
| 8 16 | 18.1713    |
| 8 17 | -1.5333    |
| 8 18 | 1.0745     |
| 8 19 | 2.9623     |
| 8 20 | -2.4111    |
| 8 21 | -2.9063    |
| 8 22 | -9.2077    |
| 8 23 | -46.5938   |
| 8 24 | 0.4761     |
| 8 25 | -0.0372    |
| 8 26 | 16.6243    |
| 8 27 | 1.0896     |
| 9 9  | -1.0011    |
| 9 10 | -4.6755    |
| 9 11 | 1.8601     |
| 9 12 | -3.2615    |
| 9 13 | -12.1529   |
| 9 14 | 2.4448     |
| 9 15 | -0.6732    |
| 9 16 | -16.6442   |
| 9 17 | -0.3377    |
| 9 18 | -1.4271    |
| 9 19 | -6.7896    |
| 9 20 | -24.5451   |
| 9 21 | -4.3104    |
| 9 22 | -4.5809    |
| 9 23 | 1.3897     |
| 9 24 | 0.2255     |
| 9 25 | 0.8876     |
| 9 26 | 10.3532    |

|       |          |
|-------|----------|
| 9 27  | 0.5439   |
| 10 10 | -8.6192  |
| 10 11 | -1.0864  |
| 10 12 | -2.2171  |
| 10 13 | -35.3643 |
| 10 14 | 6.9842   |
| 10 15 | -0.8451  |
| 10 16 | -3.6697  |
| 10 17 | -0.4825  |
| 10 18 | 0.5786   |
| 10 19 | -0.9316  |
| 10 20 | -1.3107  |
| 10 21 | -1.7927  |
| 10 22 | -9.0452  |
| 10 23 | -38.8414 |
| 10 24 | 0.3780   |
| 10 25 | 0.6099   |
| 10 26 | 24.9036  |
| 10 27 | -1.7204  |
| 11 11 | -5.6923  |
| 11 12 | -1.0481  |
| 11 13 | -1.0434  |
| 11 14 | 10.5857  |
| 11 15 | -0.3656  |
| 11 16 | -14.4767 |
| 11 17 | 1.2107   |
| 11 18 | -3.2108  |
| 11 19 | -4.3721  |
| 11 20 | 1.1734   |
| 11 21 | 5.1531   |
| 11 22 | 1.7865   |
| 11 23 | -21.4175 |
| 11 24 | -0.5014  |
| 11 25 | -0.7960  |
| 11 26 | 2.1839   |
| 11 27 | 1.4546   |
| 12 12 | -0.2524  |
| 12 13 | -10.5780 |
| 12 14 | -0.8409  |
| 12 15 | -2.9730  |
| 12 16 | -12.3212 |
| 12 17 | -1.9104  |
| 12 18 | -0.9133  |
| 12 19 | -1.1099  |
| 12 20 | 3.2221   |
| 12 21 | -0.8695  |
| 12 22 | -2.4397  |
| 12 23 | -1.9738  |
| 12 24 | -0.5430  |
| 12 25 | -0.9320  |
| 12 26 | 3.6576   |

|       |          |
|-------|----------|
| 12 27 | -0.1102  |
| 13 13 | -42.0564 |
| 13 14 | 0.2069   |
| 13 15 | -1.4200  |
| 13 16 | 4.0181   |
| 13 17 | -2.7039  |
| 13 18 | 2.1689   |
| 13 19 | -2.4230  |
| 13 20 | 0.5877   |
| 13 21 | -3.5943  |
| 13 22 | -19.9993 |
| 13 23 | -68.8371 |
| 13 24 | 0.2769   |
| 13 25 | -0.2291  |
| 13 26 | 54.7839  |
| 13 27 | 1.5721   |
| 14 14 | 3.1341   |
| 14 15 | -1.2335  |
| 14 16 | -33.8255 |
| 14 17 | 2.7331   |
| 14 18 | 5.5299   |
| 14 19 | -6.0680  |
| 14 20 | 3.4650   |
| 14 21 | -4.5053  |
| 14 22 | 1.8209   |
| 14 23 | -62.0245 |
| 14 24 | -0.5028  |
| 14 25 | 1.4081   |
| 14 26 | -9.2741  |
| 14 27 | -8.7522  |
| 15 15 | -1.7033  |
| 15 16 | 1.9844   |
| 15 17 | -2.3706  |
| 15 18 | -1.6469  |
| 15 19 | -0.3474  |
| 15 20 | -1.9441  |
| 15 21 | -2.5809  |
| 15 22 | -9.7563  |
| 15 23 | 4.3355   |
| 15 24 | -0.5045  |
| 15 25 | -1.4262  |
| 15 26 | -1.7111  |
| 15 27 | -0.2050  |
| 16 16 | 46.8462  |
| 16 17 | -5.3615  |
| 16 18 | -4.5381  |
| 16 19 | 34.8593  |
| 16 20 | -4.8562  |
| 16 21 | 11.9813  |
| 16 22 | -1.9806  |
| 16 23 | 436.4961 |

|       |          |
|-------|----------|
| 16 24 | 1.5012   |
| 16 25 | -5.8731  |
| 16 26 | 6.8134   |
| 16 27 | -7.0636  |
| 17 17 | -7.1708  |
| 17 18 | -6.4800  |
| 17 19 | -7.7857  |
| 17 20 | -3.8845  |
| 17 21 | -4.7416  |
| 17 22 | -4.2229  |
| 17 23 | -24.8984 |
| 17 24 | -0.7672  |
| 17 25 | -2.7720  |
| 17 26 | 3.2746   |
| 17 27 | 0.3920   |
| 18 18 | -1.1974  |
| 18 19 | -4.6334  |
| 18 20 | -0.0085  |
| 18 21 | -7.7125  |
| 18 22 | -1.9594  |
| 18 23 | -8.1665  |
| 18 24 | -8.8120  |
| 18 25 | -5.5705  |
| 18 26 | -1.9045  |
| 18 27 | -0.2390  |
| 19 19 | -3.2567  |
| 19 20 | -2.9418  |
| 19 21 | -0.0597  |
| 19 22 | 0.0860   |
| 19 23 | 48.6586  |
| 19 24 | -0.9721  |
| 19 25 | -14.2872 |
| 19 26 | 1.4655   |
| 19 27 | -2.1222  |
| 20 20 | -1.1388  |
| 20 21 | -4.2493  |
| 20 22 | -7.3199  |
| 20 23 | -6.8701  |
| 20 24 | -5.1487  |
| 20 25 | -5.3264  |
| 20 26 | -2.9232  |
| 20 27 | -0.9406  |
| 21 21 | -5.0816  |
| 21 22 | -12.8228 |
| 21 23 | 22.7741  |
| 21 24 | -7.3463  |
| 21 25 | -14.8108 |
| 21 26 | 1.2269   |
| 21 27 | -0.6833  |
| 22 22 | -10.1845 |
| 22 23 | -23.1598 |

|       |           |
|-------|-----------|
| 22 24 | -2.7012   |
| 22 25 | -6.7736   |
| 22 26 | 2.8074    |
| 22 27 | 0.3280    |
| 23 23 | 169.8470  |
| 23 24 | -2.3764   |
| 23 25 | -9.2299   |
| 23 26 | 72.4547   |
| 23 27 | -14.6926  |
| 24 24 | -34.7513  |
| 24 25 | -112.8755 |
| 24 26 | -1.2113   |
| 24 27 | -0.2295   |
| 25 25 | -37.6713  |
| 25 26 | -0.9077   |
| 25 27 | 0.1788    |
| 26 26 | -118.8690 |
| 26 27 | -2.3147   |
| 27 27 | -87.3310  |

**Table S1:** Relative energies ( $\Delta E$ , kcal mol<sup>-1</sup>) and rovibrational parameters of grid points along the (variational) reaction coordinate: OH + CH<sub>3</sub>OOH → PRC1\*

|            | RC = 3.25 Å | 3.5       | 3.75      | 4         | 4.25      | 4.5       | 4.75      | 5         | 5.25      | 5.5       |
|------------|-------------|-----------|-----------|-----------|-----------|-----------|-----------|-----------|-----------|-----------|
| vib        | 53.9899     | 48.3897   | 43.8391   | 30.1214   | 21.2453   | 18.6635   | 30.2263   | 26.7869   | 23.7657   | 21.4999   |
| vib        | 134.9467    | 97.8482   | 79.8115   | 38.6061   | 40.2460   | 85.6252   | 61.3893   | 49.9414   | 42.3061   | 47.1363   |
| vib        | 157.3351    | 139.3960  | 128.6913  | 110.5311  | 83.6964   | 243.1684  | 220.4599  | 207.4286  | 189.8928  | 181.8112  |
| vib        | 248.1631    | 241.0567  | 198.7739  | 209.6619  | 217.1599  | 257.5112  | 254.6957  | 253.8230  | 235.0774  | 190.8880  |
| vib        | 315.0733    | 274.0600  | 258.4927  | 258.4857  | 258.8320  | 342.7006  | 313.1105  | 256.2177  | 249.1297  | 244.3112  |
| vib        | 427.8135    | 432.7611  | 436.4409  | 434.4561  | 372.5554  | 376.8555  | 323.1292  | 309.9147  | 269.3689  | 255.1805  |
| vib        | 449.4792    | 468.6694  | 516.5371  | 465.3288  | 441.2517  | 438.0764  | 437.1502  | 436.9296  | 436.8987  | 437.9123  |
| vib        | 804.3184    | 805.5602  | 806.3876  | 807.3827  | 804.2420  | 796.9900  | 796.0434  | 795.6324  | 797.1777  | 798.7796  |
| vib        | 1020.2037   | 1022.9688 | 1023.1897 | 1022.8602 | 1020.9930 | 1011.2900 | 1012.2112 | 1013.4666 | 1014.5430 | 1015.2135 |
| vib        | 1157.3479   | 1156.7774 | 1156.3569 | 1155.9013 | 1155.6342 | 1155.8447 | 1155.8393 | 1155.5032 | 1155.4819 | 1155.5817 |
| vib        | 1190.1260   | 1190.4461 | 1190.6876 | 1190.5885 | 1189.7858 | 1187.7888 | 1188.1252 | 1188.1606 | 1188.2936 | 1188.5756 |
| vib        | 1416.2404   | 1409.9689 | 1384.2698 | 1369.7169 | 1350.4884 | 1342.5095 | 1343.9245 | 1342.9526 | 1343.2636 | 1343.8466 |
| vib        | 1428.0353   | 1427.4975 | 1427.1068 | 1426.6938 | 1426.7861 | 1428.0609 | 1427.9069 | 1427.6946 | 1427.6581 | 1427.7684 |
| vib        | 1446.7202   | 1446.2115 | 1446.0938 | 1446.1745 | 1446.1332 | 1446.0294 | 1445.8934 | 1445.9372 | 1446.0150 | 1446.1069 |
| vib        | 1489.2959   | 1488.8470 | 1488.4921 | 1487.9617 | 1487.9901 | 1488.3485 | 1488.0919 | 1488.1006 | 1488.0404 | 1488.0273 |
| vib        | 3015.1971   | 3013.1557 | 3012.4614 | 3012.2500 | 3013.1306 | 3019.1285 | 3018.4043 | 3017.6809 | 3017.1885 | 3016.8911 |
| vib        | 3102.2490   | 3098.4670 | 3097.1994 | 3096.6584 | 3097.9171 | 3107.5859 | 3106.4569 | 3105.2141 | 3104.2815 | 3103.8250 |
| vib        | 3123.0766   | 3120.7695 | 3120.4291 | 3121.1640 | 3122.4524 | 3129.9198 | 3128.8948 | 3128.0430 | 3127.6404 | 3127.4623 |
| vib        | 3642.9064   | 3660.6441 | 3669.6211 | 3672.8738 | 3672.5236 | 3627.2652 | 3635.6673 | 3644.6892 | 3653.6526 | 3661.3795 |
| vib        | 3669.0679   | 3674.4726 | 3683.6216 | 3699.7968 | 3716.2562 | 3742.3613 | 3742.8057 | 3742.6380 | 3742.0372 | 3741.5466 |
| A          | 0.4257      | 0.4848    | 0.5600    | 0.6527    | 0.7619    | 0.6838    | 0.6753    | 0.6905    | 0.6792    | 0.6274    |
| B          | 0.1009      | 0.0888    | 0.0792    | 0.0727    | 0.0670    | 0.0638    | 0.0593    | 0.0548    | 0.0500    | 0.0455    |
| C          | 0.0894      | 0.0822    | 0.0760    | 0.0707    | 0.0656    | 0.0616    | 0.0568    | 0.0524    | 0.0479    | 0.0438    |
| $\Delta E$ | 0.0915      | 0.5360    | 0.8820    | 1.0778    | 1.3480    | 1.5695    | 1.7911    | 2.3247    | 2.7699    | 3.1282    |

**Table S1: (Continued)**

| RC = 5.75 Å | 6         | 6.25      | 6.5       | 6.75      | 7         | 7.25      | 7.5       | 7.75      | 8         |
|-------------|-----------|-----------|-----------|-----------|-----------|-----------|-----------|-----------|-----------|
| 20.2831     | 18.6319   | 17.0818   | 15.6864   | 14.4275   | 13.3819   | 12.2217   | 11.0109   | 10.5118   | 9.8251    |
| 31.7351     | 27.5767   | 26.3200   | 22.4472   | 20.7798   | 18.5365   | 15.7556   | 13.9126   | 12.6567   | 11.4878   |
| 153.7343    | 138.4774  | 132.4768  | 120.0161  | 108.9703  | 96.7236   | 88.0959   | 80.7824   | 74.5983   | 69.2271   |
| 191.3966    | 170.0738  | 139.3157  | 127.0739  | 116.4693  | 113.7687  | 103.7073  | 95.3464   | 88.1355   | 81.7631   |
| 229.5432    | 226.3661  | 225.0253  | 222.2366  | 221.1204  | 219.4534  | 217.7338  | 216.7737  | 215.9748  | 215.3335  |
| 256.1800    | 255.5043  | 254.9328  | 254.7538  | 254.6247  | 254.5786  | 254.4901  | 254.4054  | 254.3559  | 254.3112  |
| 437.3670    | 437.4823  | 437.6164  | 437.6506  | 437.7107  | 437.7155  | 437.7330  | 437.7641  | 437.7685  | 437.7840  |
| 799.9114    | 800.7511  | 801.4502  | 801.8327  | 802.1180  | 802.2575  | 802.4833  | 802.6439  | 802.7817  | 802.8867  |
| 1015.9699   | 1016.4273 | 1016.6651 | 1016.9651 | 1017.2139 | 1017.4690 | 1017.6437 | 1017.7789 | 1017.8913 | 1017.9907 |
| 1155.5694   | 1155.6221 | 1155.6845 | 1155.7192 | 1155.7513 | 1155.7770 | 1155.8106 | 1155.8312 | 1155.8460 | 1155.8610 |
| 1188.6523   | 1188.7230 | 1188.7864 | 1188.7870 | 1188.7891 | 1188.7483 | 1188.7448 | 1188.7395 | 1188.7332 | 1188.7274 |
| 1343.6289   | 1343.7742 | 1343.9227 | 1343.9548 | 1344.0457 | 1344.0759 | 1344.1204 | 1344.1690 | 1344.2032 | 1344.2470 |
| 1427.7064   | 1427.7434 | 1427.8145 | 1427.8179 | 1427.8218 | 1427.8002 | 1427.8119 | 1427.8153 | 1427.7978 | 1427.8428 |
| 1446.1542   | 1446.1883 | 1446.2058 | 1446.2142 | 1446.2230 | 1446.2259 | 1446.2313 | 1446.2339 | 1446.2354 | 1446.2363 |
| 1488.0726   | 1488.1174 | 1488.1627 | 1488.1963 | 1488.2264 | 1488.2461 | 1488.2638 | 1488.2810 | 1488.2977 | 1488.3138 |
| 3016.5617   | 3016.3729 | 3016.2669 | 3016.1382 | 3016.0241 | 3015.9220 | 3015.8407 | 3015.7787 | 3015.7272 | 3015.6911 |
| 3103.1325   | 3102.7883 | 3102.6144 | 3102.3887 | 3102.1968 | 3102.0170 | 3101.8877 | 3101.7924 | 3101.7183 | 3101.6571 |
| 3127.1022   | 3126.8982 | 3126.7789 | 3126.6142 | 3126.4687 | 3126.3277 | 3126.2220 | 3126.1347 | 3126.0610 | 3125.9973 |
| 3667.0929   | 3671.0822 | 3673.9526 | 3676.0973 | 3677.7459 | 3678.8053 | 3679.9366 | 3680.7031 | 3681.2483 | 3681.6588 |
| 3741.4226   | 3741.4019 | 3741.3923 | 3741.4150 | 3741.4122 | 3741.5074 | 3741.5565 | 3741.6078 | 3741.6585 | 3741.7253 |
|             |           |           |           |           |           |           |           |           |           |
| 0.6663      | 0.6570    | 0.5902    | 0.5786    | 0.5673    | 0.6023    | 0.5885    | 0.5745    | 0.5591    | 0.5472    |
| 0.0417      | 0.0383    | 0.0354    | 0.0328    | 0.0304    | 0.0282    | 0.0262    | 0.0244    | 0.0228    | 0.0213    |
| 0.0403      | 0.0372    | 0.0344    | 0.0319    | 0.0296    | 0.0276    | 0.0257    | 0.0240    | 0.0224    | 0.0209    |
|             |           |           |           |           |           |           |           |           |           |
| 3.3639      | 3.5413    | 3.6653    | 3.7552    | 3.8253    | 3.8813    | 3.9151    | 3.9430    | 3.9665    | 3.9848    |

**Table S2:** Relative energies ( $\Delta E$ , kcal mol<sup>-1</sup>) and rovibrational parameters of grid points along the (variational) reaction coordinate: OH + CH<sub>3</sub>OOH → PRC2\*

|                                      | RC = 3.0 Å | 3.2       | 3.4       | 3.6       | 3.8       |
|--------------------------------------|------------|-----------|-----------|-----------|-----------|
| vib                                  | 31.6779    | 53.2711   | 32.3123   | 55.3550   | 47.4821   |
| vib                                  | 92.4535    | 77.3989   | 59.2364   | 83.5554   | 86.3226   |
| vib                                  | 261.1210   | 247.2116  | 241.6330  | 227.7970  | 226.6496  |
| vib                                  | 279.4924   | 280.1503  | 273.1638  | 276.9271  | 256.1631  |
| vib                                  | 436.9019   | 395.4549  | 362.6588  | 315.9241  | 288.1478  |
| vib                                  | 483.2664   | 429.4635  | 384.9325  | 345.5111  | 314.6925  |
| vib                                  | 511.8196   | 450.3226  | 441.0910  | 442.7155  | 441.6694  |
| vib                                  | 800.7182   | 801.2398  | 800.9711  | 802.0377  | 801.9177  |
| vib                                  | 1009.5514  | 1013.2682 | 1015.3547 | 1016.4990 | 1018.1279 |
| vib                                  | 1167.5699  | 1153.2300 | 1153.4991 | 1150.5032 | 1131.5124 |
| vib                                  | 1188.4929  | 1190.1671 | 1188.0147 | 1190.8653 | 1190.7739 |
| vib                                  | 1341.7861  | 1343.0928 | 1344.1985 | 1344.8795 | 1345.0105 |
| vib                                  | 1432.9870  | 1431.2634 | 1428.4565 | 1429.5016 | 1427.3548 |
| vib                                  | 1484.5049  | 1453.6454 | 1454.3106 | 1451.0882 | 1443.9511 |
| vib                                  | 1496.9421  | 1499.1054 | 1503.7589 | 1508.0253 | 1504.5041 |
| vib                                  | 3022.1841  | 3018.2694 | 3017.3911 | 3017.6607 | 3014.9295 |
| vib                                  | 3124.8758  | 3104.2273 | 3099.5656 | 3094.9880 | 3082.7543 |
| vib                                  | 3136.6102  | 3131.5662 | 3131.9415 | 3129.7635 | 3130.6510 |
| vib                                  | 3602.2265  | 3613.6463 | 3623.8742 | 3633.7280 | 3644.2483 |
| vib                                  | 3738.4601  | 3739.7978 | 3740.6608 | 3741.2802 | 3741.8580 |
| A (cm <sup>-1</sup> )                | 0.3505     | 0.3467    | 0.3437    | 0.3423    | 0.3434    |
| B                                    | 0.1172     | 0.1075    | 0.0998    | 0.0931    | 0.0873    |
| C                                    | 0.0901     | 0.0840    | 0.0790    | 0.0747    | 0.0710    |
| $\Delta E$ (kcal mol <sup>-1</sup> ) | 0.0000     | 0.1200    | 0.4947    | 0.9908    | 1.3329    |



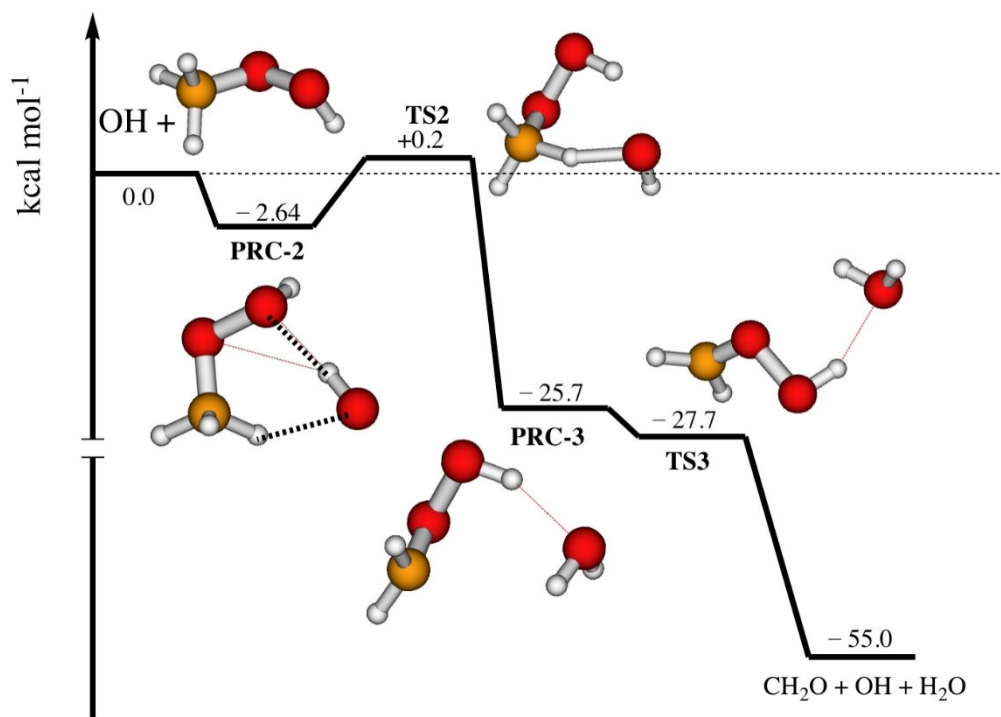

**Fig. S1:** Unscaled potential energy surface for the H-abstraction pathway at a  $\alpha$ H-atom of the  $\text{CH}_3$  group of  $\text{CH}_3\text{OOH}$ , constructed using the amHEAT-345(Q) method.

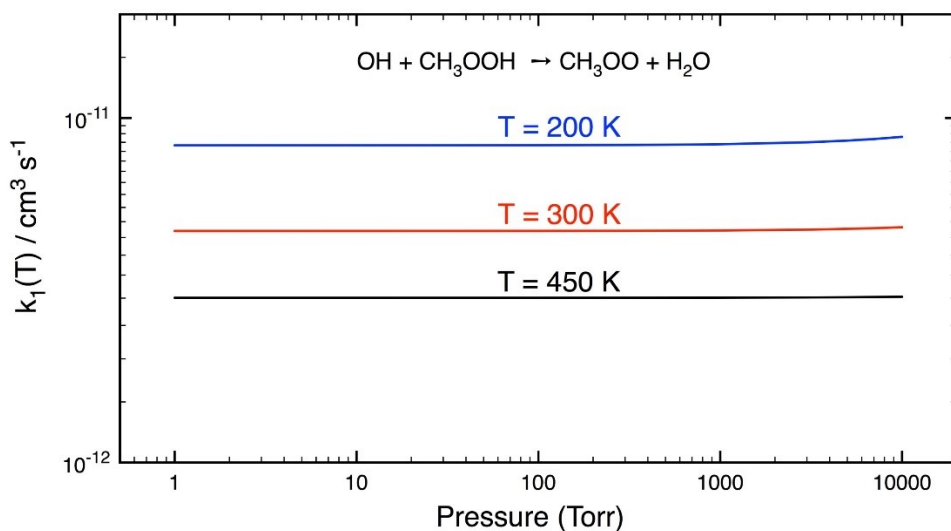

**Fig. S2:** Fall-off curves for the  $\text{OH} + \text{CH}_3\text{OOH} \rightarrow \text{CH}_3\text{OO} + \text{H}_2\text{O}$  pathway, calculated as functions of temperature and pressure.

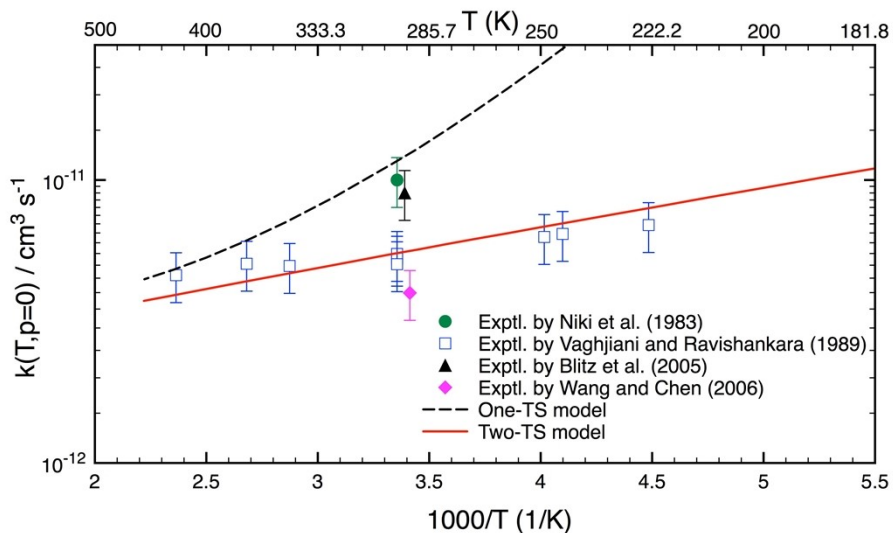

**Figure S3:** A comparison of the one-TS kinetic model and the two-TS kinetic model.

**Table S3:** Collisional parameters and energies are used in the E,J-resolved 2DME model.

| Parameters                   | Values                                                                                                                                                                      |
|------------------------------|-----------------------------------------------------------------------------------------------------------------------------------------------------------------------------|
| $N_2$                        | Mass = 28.01 g/mol, $\sigma = 3.7047 \text{ \AA}$ , $\varepsilon/k_B = 84.942 \text{ K}$                                                                                    |
| $CH_5O_3$                    | Mass = 65.0 g/mol, $\sigma = 5.46 \text{ \AA}$ , $\varepsilon/k_B = 401 \text{ K}$                                                                                          |
| $E_{\max}$                   | $30,000 \text{ cm}^{-1}$ above $CH_5O_3$ when $T \leq 500 \text{ K}$                                                                                                        |
| $\Delta E_{\text{grain}}$    | $10 \text{ cm}^{-1}$ when $T \leq 500 \text{ K}$                                                                                                                            |
| $\langle \Delta E_d \rangle$ | $2.0 \left( \frac{T}{300} \right)^0 (i^9 a \bar{m}^1)$ , for the fixed-J ME model<br>$1.8 \left( \frac{T}{300} \right)^0 (i^9 a \bar{m}^1)$ , for the E,J-resolved ME model |
| $J_{\max}$                   | 200 with $T \leq 500 \text{ K}$                                                                                                                                             |
| $\Delta J$                   | 5                                                                                                                                                                           |

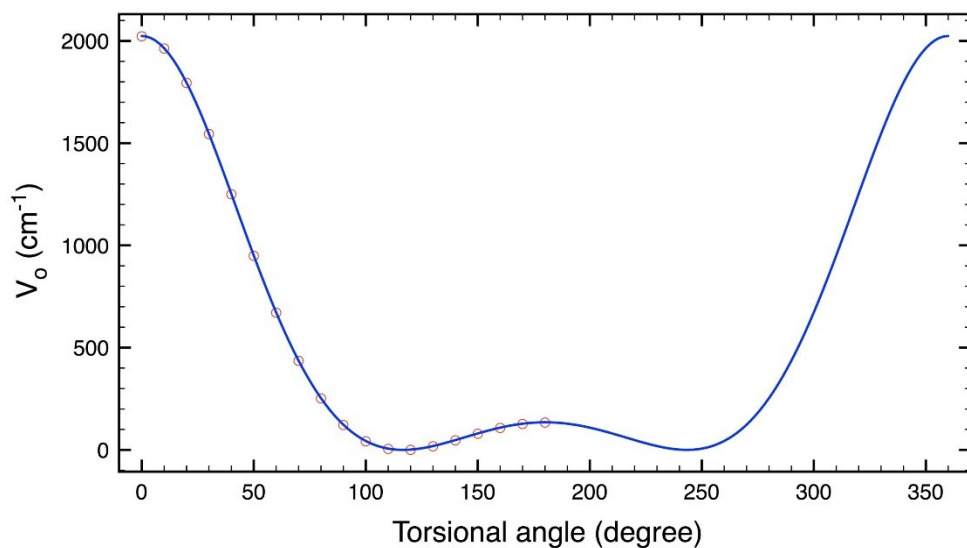

**Fig. S4:** Torsional potential energy ( $\text{cm}^{-1}$ ),

$$V(\theta)$$

$$= 583.7 + 849.743\cos(\theta) + 477.487\cos(2\theta) + 91.231\cos(3\theta) + 17.6154\cos(4\theta) + 3.68253\cos(5\theta) + 0.675265\cos(6\theta), \theta \text{ in rad}$$

, as a function of the torsional dihedral angle,  $\angle\text{HOOC}$  in  $\text{CH}_3\text{OOH}$ , calculated at fc-CCSD(T)/aug-cc-pVTZ level of theory.

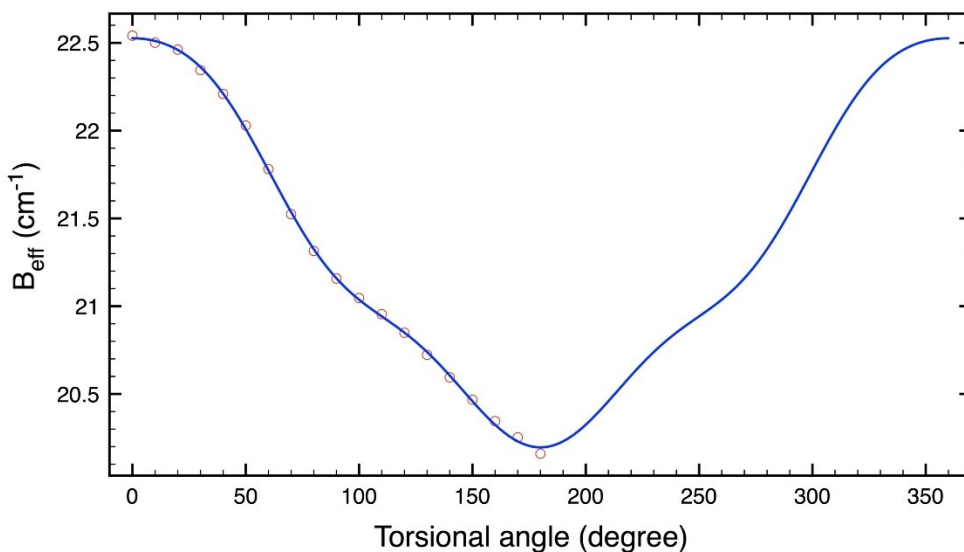

**Fig. S5:** Effective rotational constant ( $\text{cm}^{-1}$ ),

$$B_{\text{eff}}(\theta)$$

$$= 21.3275 + 1.09194\cos(\theta) + 0.100323\cos(2\theta) + 0.0802694\cos(3\theta) - 0.0675463\cos(4\theta) - 0.00071675\cos(5\theta) + 0.00071675\cos(6\theta), \theta \text{ in rad}$$

, as a function of the torsional dihedral angle,  $\angle\text{HOOC}$  in  $\text{CH}_3\text{OOH}$ , calculated at fc-CCSD(T)/aug-cc-pVTZ level of theory.

List of eigenvalues ( $\text{cm}^{-1}$ ) for 1DHR with the torsional dihedral angle,  $\angle\text{HOOC}$  in  $\text{CH}_3\text{OOH}$ :

- 1 75.6270181972906
- 2 90.3260263764187
- 3 196.523350235676
- 4 281.814563346696
- 5 394.143067260202
- 6 517.511211000539
- 7 651.100512938799
- 8 792.625620557009
- 9 940.462323131874
- 10 1093.17355940034
- 11 1249.13225842406
- 12 1407.57026932762
- 13 1563.68228278988
- 14 1725.55863072864
- 15 1855.88271315338
- 16 2045.68207117911
- 17 2098.83586139822
- 18 2387.21171350578
- 19 2394.98402287398
- 20 2771.77567321435
- 21 2772.46496197221
- 22 3204.74384482189
- 23 3204.79274786983
- 24 3684.63017631727
- 25 3684.63315822797
- 26 4209.86572641677
- 27 4209.86588789967
- 28 4779.51189088640
- 29 4779.51189880768
- 30 5393.01082747935
- 31 5393.01082783593
- 32 6050.01200275167
- 33 6050.01200276627
- 34 6750.28386777755
- 35 6750.28386777793
- 36 7493.66732958988
- 37 7493.66732959009
- 38 8280.04958149238
- 39 8280.04958149249
- 40 9109.34853834079
- 41 9109.34853834103
- 42 9981.50315442849
- 43 9981.50315442862
- 44 10896.4671758169
- 45 10896.4671758170
- 46 11854.2049834597

47 11854.2049834600  
48 12854.6887543447  
49 12854.6887543449  
50 13897.8964785363  
51 13897.8964785364  
52 14983.8105464502  
53 14983.8105464503  
54 16112.4167246456  
55 16112.4167246457  
56 17283.7034016201  
57 17283.7034016203  
58 18497.6610245913  
59 18497.6610245913  
60 19754.2816735236  
61 19754.2816735238  
62 21053.5587352217  
63 21053.5587352221  
64 22395.4866513262  
65 22395.4866513263  
66 23780.0607215539  
67 23780.0607215542  
68 25207.2769486920  
69 25207.2769486922  
70 26677.1319154606  
71 26677.1319154606  
72 28189.6226859406  
73 28189.6226859408  
74 29744.7467260930  
75 29744.7467260932  
76 31342.5018392421  
77 31342.5018392422

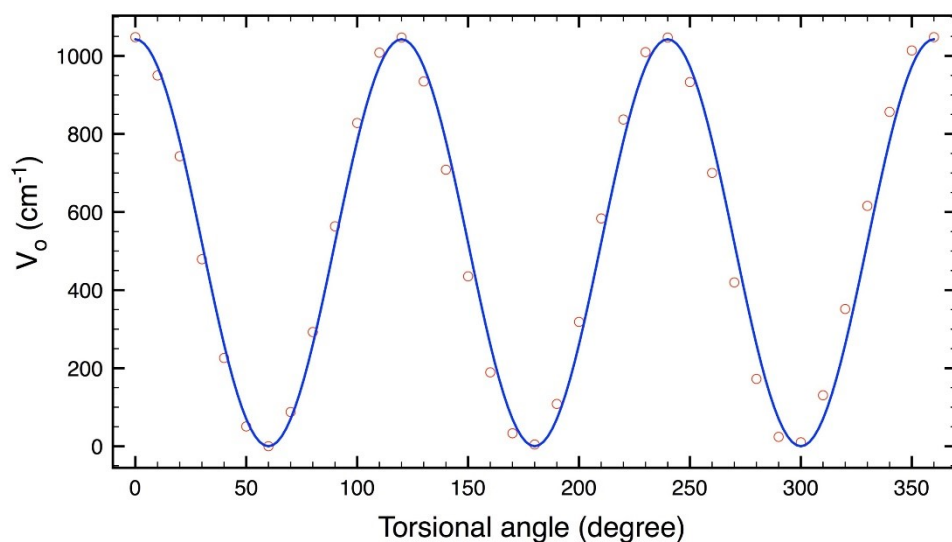

**Fig. S6:** Torsional potential energy ( $\text{cm}^{-1}$ ),  $V(\theta) = 521.287 + 521.287\cos(3\theta)$ ,  $\theta$  in  $\text{rad}$ , as a function of the torsional dihedral angle,  $\angle\text{HCOO}$  in  $\text{CH}_3\text{OOH}$ , calculated at  $\text{fc-CCSD(T)/aug-cc-pVTZ}$  level of theory.

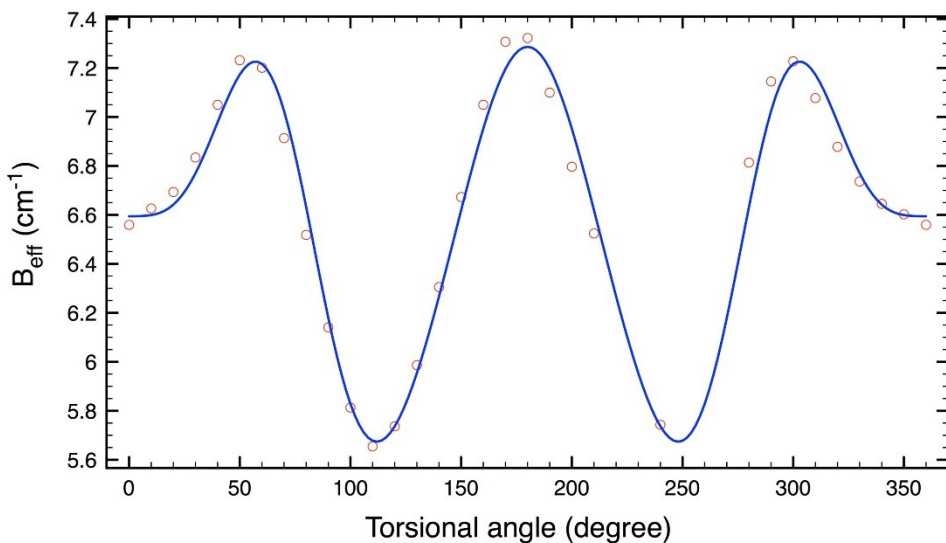

**Fig. S7:** Effective rotational constant ( $\text{cm}^{-1}$ ),

$$B_{\text{eff}}(\theta) = 6.57699 + 0.174864\cos(\theta) + 0.326404\cos(2\theta) - 0.608597\cos(3\theta) - 0.0171895\cos(4\theta) + 0.000000\cos(5\theta) + 0.0541331\cos(6\theta), \theta \text{ in rad}$$

, as a function of the torsional dihedral angle,  $\angle\text{HCOO}$  in  $\text{CH}_3\text{OOH}$ , calculated at  $\text{fc-CCSD(T)/aug-cc-pVTZ}$  level of theory.

List of eigenvalues ( $\text{cm}^{-1}$ ) for 1DHR with the torsional dihedral angle,  $\angle\text{HCOO}$  in  $\text{CH}_3\text{OOH}$

1 123.482637004839  
2 123.482734765220  
3 124.511626231452  
4 363.875130141331  
5 363.880769426969  
6 366.177605443605  
7 582.225322245887  
8 582.364092700877  
9 586.018457048000  
10 775.409171692808  
11 776.957419646519  
12 781.308535949279  
13 930.364427525533  
14 945.915004530029  
15 948.547338258088  
16 1053.60088848284  
17 1055.23402977935  
18 1122.00305434303  
19 1148.59876922421  
20 1244.01317498870  
21 1244.74604156107  
22 1370.78221526950  
23 1370.88957792553  
24 1513.41889381170  
25 1513.78833065054  
26 1671.43446086360  
27 1671.45331110713  
28 1843.68861479100  
29 1843.69042901685  
30 2029.95509156887  
31 2029.95628020805  
32 2229.99601826858  
33 2229.99611195046  
34 2443.64404673565  
35 2443.64405416696  
36 2670.78246137133  
37 2670.78246304427  
38 2911.32640441287  
39 2911.32640458091  
40 3165.21289233541  
41 3165.21289234888  
42 3432.39426701066  
43 3432.39426701219  
44 3712.83385757639  
45 3712.83385757654  
46 4006.50303527969  
47 4006.50303527974

48 4313.37916299957  
49 4313.37916299968  
50 4633.44413719022  
51 4633.44413719023  
52 4966.68333187842  
53 4966.68333187848  
54 5313.08482141492  
55 5313.08482141493  
56 5672.63880013518  
57 5672.63880013530  
58 6045.33714344141  
59 6045.33714344144  
60 6431.17307196114  
61 6431.17307196117  
62 6830.14089184269  
63 6830.14089184276  
64 7242.23579197237  
65 7242.23579197239  
66 7667.45368421795  
67 7667.45368421797  
68 8105.79107652899  
69 8105.79107652905  
70 8557.24497136096  
71 8557.24497136100  
72 9021.81278378903  
73 9021.81278378905  
74 9499.49227505382  
75 9499.49227505397  
76 9990.28149829396  
77 9990.28149829400  
78 10494.1787539691  
79 10494.1787539692  
80 11011.1825530425  
81 11011.1825530426  
82 11541.2915864130  
83 11541.2915864131  
84 12084.5046994098  
85 12084.5046994098  
86 12640.8208704136  
87 12640.8208704136  
88 13210.2391928570  
89 13210.2391928571  
90 13792.7588600061  
91 13792.7588600061  
92 14388.3791520415  
93 14388.3791520415  
94 14997.0994250514  
95 14997.0994250515  
96 15618.9191016180  
97 15618.9191016181  
98 16253.8376627393



99 16253.8376627394  
100 16901.8546408745  
101 16901.8546408746  
102 17562.9696139364  
103 17562.9696139365  
104 18237.1822000876  
105 18237.1822000877  
106 18924.4920532188  
107 18924.4920532189  
108 19624.8988590093  
109 19624.8988590093  
110 20338.4023314849  
111 20338.4023314849  
112 21065.0022100042  
113 21065.0022100042  
114 21804.6982566107  
115 21804.6982566108  
116 22557.4902537045  
117 22557.4902537045  
118 23323.3780019861  
119 23323.3780019861  
120 24102.3613186400  
121 24102.3613186400  
122 24894.4400357247  
123 24894.4400357248  
124 25699.6139987438  
125 25699.6139987439  
126 26517.8830653737  
127 26517.8830653737  
128 27349.2471043307  
129 27349.2471043308  
130 28193.7059943590  
131 28193.7059943591  
132 29051.2596233248  
133 29051.2596233249  
134 29921.9078874052  
135 29921.9078874053  
136 30805.6506903595  
137 30805.6506903596

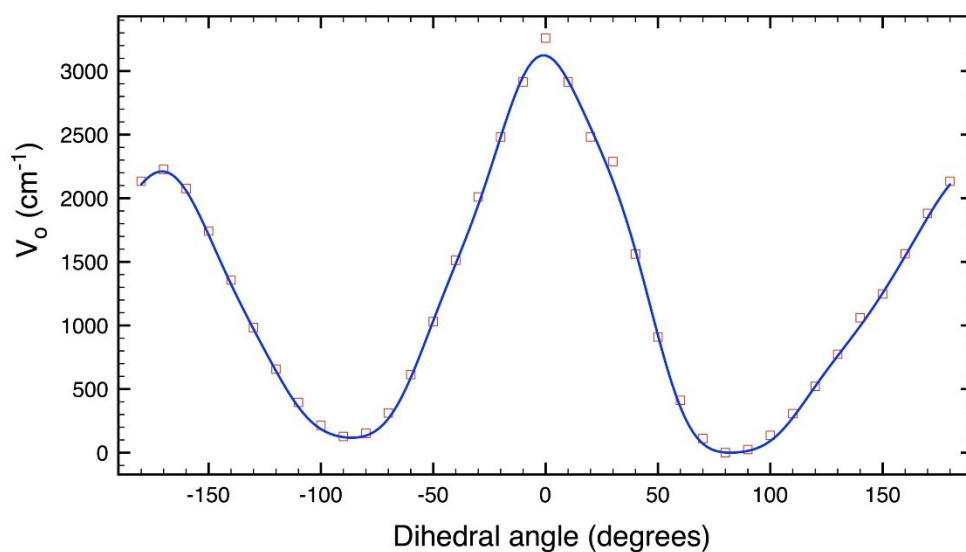

**Fig. S8:** Torsional potential energy ( $\text{cm}^{-1}$ ),

$$V(\theta)$$

$$= 1210.366 + 311.712\cos(\theta) + 1260.61\cos(2\theta) + 182.382\cos(3\theta) + 102.931\cos(4\theta) - 17.695\sin(\theta) + 13.2608\cos(6\theta) + 8.15387\cos(7\theta) + 28.487\cos(8\theta) + 22.7053\cos(9\theta) - 91.6507\sin(\theta) + 77.2507\sin(2\theta) - 42.4738\sin(3\theta) + 94.4265\sin(4\theta) - 21.6312\sin(5\theta) + 11.5739\sin(6\theta) - 32.1508\sin(7\theta) - 14.7979\sin(8\theta) - 15.41\sin(9\theta), \theta \text{ in rad}$$

, as a function of the torsional dihedral angle,  $\angle\text{COOH}$  in **TS1**, calculated at fc-CCSD(T)/aug-cc-pVTZ level of theory.

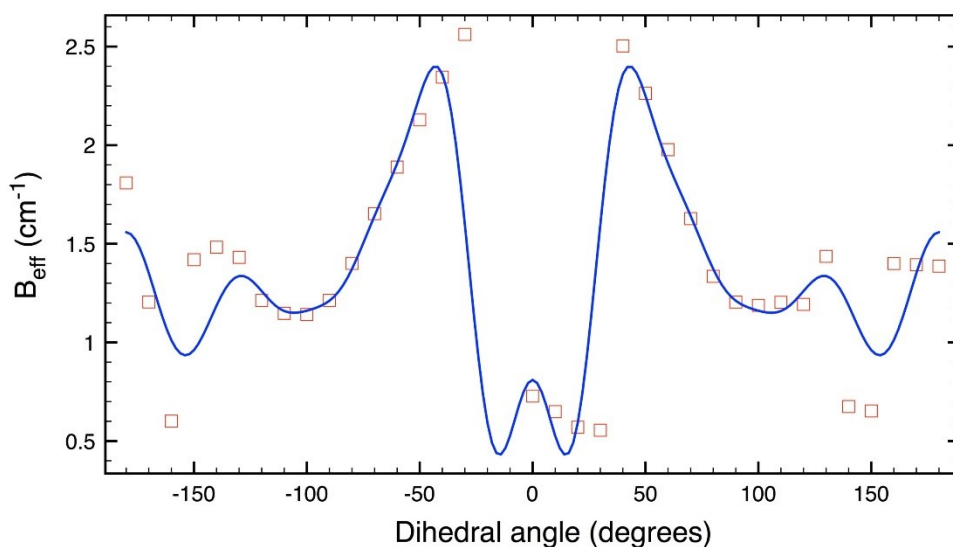

**Fig. S9:** Effective rotational constant ( $\text{cm}^{-1}$ ),

$$B_{\text{eff}}(\theta) = 1.33718 + 0.109138\cos(\theta) - 0.207952\cos(2\theta) - 0.427485\cos(3\theta) - 0.336358\cos(4\theta) - 0.204\cos(5\theta) + 0.0969854\cos(6\theta) + 0.00337438\cos(7\theta) + 0.180567\cos(8\theta) + 0.087079\cos(9\theta) + 0.0974984\cos(10\theta) + 0.0577174\cos(11\theta) + 0.0163259\cos(12\theta), \theta \text{ in rad}$$

, as a function of the torsional dihedral angle,  $\angle\text{COOOH}$  in **TS1**, calculated at fc-CCSD(T)/aug-cc-pVTZ level of theory.

List of eigenvalues ( $\text{cm}^{-1}$ ) for 1DHR with the torsional dihedral angle,  $\angle\text{COOOH}$  in TS1b

- 1 38.9823524715608
- 2 120.582291133320
- 3 159.576697018413
- 4 213.193742418202
- 5 246.405063852239
- 6 310.627601163344
- 7 341.546290482596
- 8 410.157749360313
- 9 441.043960601990
- 10 510.033589209126
- 11 542.908113346252
- 12 609.034033443731
- 13 645.865623613807
- 14 706.329554868179
- 15 749.022786365376
- 16 801.482278365599
- 17 851.730072792490
- 18 894.443367132008
- 19 953.527246203393
- 20 985.423113659317
- 21 1054.11599203890
- 22 1074.67159822198
- 23 1153.32996216747
- 24 1162.34654024570
- 25 1248.53167060628
- 26 1251.09128804919
- 27 1333.31154058940
- 28 1347.36257861471
- 29 1416.81767032095
- 30 1442.11116119841
- 31 1499.22782010905
- 32 1535.29219230731
- 33 1580.73152667071
- 34 1626.84282086163
- 35 1661.48332784256
- 36 1716.67547002296
- 37 1741.56192197854

38 1804.66342063845  
39 1820.94207110391  
40 1890.61561281812  
41 1899.47361434272  
42 1974.22771185175  
43 1976.85282137900  
44 2052.44478830286  
45 2055.05798297731  
46 2124.80437110861  
47 2132.39734256854  
48 2190.21250963565  
49 2206.97490214876  
50 2252.18754649530  
51 2281.65184011514  
52 2321.63037960928  
53 2357.95910402130  
54 2397.19027299877  
55 2435.84332539508  
56 2475.26115249167  
57 2514.60869870603  
58 2554.08520398698  
59 2593.44882167016  
60 2632.67667589097  
61 2671.67172254060  
62 2710.38996156943  
63 2748.78669602013  
64 2786.84276999035  
65 2824.53025610775  
66 2861.88593349962  
67 2898.77148750553  
68 2935.51923121083  
69 2971.12738733133  
70 3007.86805054841  
71 3039.84710745184  
72 3079.52410494734  
73 3101.19872462821  
74 3152.03994169810  
75 3160.47475242286  
76 3227.38508164553  
77 3229.57078229637  
78 3306.69580975201  
79 3307.20260717157  
80 3390.12027733245  
81 3390.23668047368  
82 3477.40900244609  
83 3477.43619034414  
84 3568.27907512625  
85 3568.28559024153  
86 3662.50539730847  
87 3662.50700422561  
88 3759.91987376720

89 3759.92028187680  
90 3860.39608058286  
91 3860.39618723090  
92 3963.83665201325  
93 3963.83668067287  
94 4070.16474414152  
95 4070.16475203496  
96 4179.31840507375  
97 4179.31840730358  
98 4291.24679456782  
99 4291.24679521290  
100 4405.90757086754  
101 4405.90757105664  
102 4523.26503103371  
103 4523.26503109106  
104 4643.28875219569  
105 4643.28875221325  
106 4765.95257573412  
107 4765.95257573934  
108 4891.23383262591  
109 4891.23383262824  
110 5019.11274241485  
111 5019.11274241883  
112 5149.57193982063  
113 5149.57193982347  
114 5282.59609689157  
115 5282.59609690152  
116 5418.17161789018  
117 5418.17161792167  
118 5556.28639031468  
119 5556.28639034292  
120 5696.92957971881  
121 5696.92957977182  
122 5840.09145934251  
123 5840.09145954251  
124 5985.76326766832  
125 5985.76326787757  
126 6133.93708777526  
127 6133.93708805614  
128 6284.60574521472  
129 6284.60574654481  
130 6437.76272251546  
131 6437.76272443141  
132 6593.40208353755  
133 6593.40208370761  
134 6751.51840285176  
135 6751.51840901375  
136 6912.10672492342  
137 6912.10673673897  
138 7075.16250859892  
139 7075.16251346378

140 7240.68155588844  
141 7240.68158286813  
142 7408.66002561070  
143 7408.66009877865  
144 7579.09440798617  
145 7579.09448592758  
146 7751.98143241264  
147 7751.98147309989  
148 7927.31790597897  
149 7927.31819871768  
150 8105.10119921305  
151 8105.10167374205  
152 8285.32891948472  
153 8285.32906864706  
154 8467.99779044338  
155 8467.99881492978  
156 8653.10582881230  
157 8653.10842711671  
158 8840.65200784438  
159 8840.65482666729  
160 9030.63493313296  
161 9030.63559089590  
162 9223.04676289534  
163 9223.05486756790  
164 9417.89104202082  
165 9417.90535545563  
166 9615.17133826347  
167 9615.17966016122  
168 9814.87141068108  
169 9814.89052219522  
170 10016.9831142698  
171 10017.0436795582  
172 10221.5320915221  
173 10221.6126451919  
174 10428.5441093437  
175 10428.5713950497  
176 10637.9083754038  
177 10638.0282555720  
178 10849.6567833608  
179 10849.9433242718  
180 11063.9027664233  
181 11064.1879180427  
182 11280.6529535055  
183 11280.7374740268  
184 11499.3433641402  
185 11500.1531253401  
186 11720.4906441500  
187 11721.9484534748  
188 11944.5046302823  
189 11945.7526561288  
190 12171.2704178725

191 12171.6774330673  
192 12398.7067188831  
193 12401.7737259638  
194 12628.9933152426  
195 12633.7781936170  
196 12863.3230839769  
197 12866.1069472493  
198 13097.8031154748  
199 13102.1657261442  
200 13330.5977711672  
201 13344.5031041021  
202 13568.8266338107  
203 13587.5065616997  
204 13815.6510717911  
205 13826.8974594253  
206 14060.8235706811  
207 14070.6952578222  
208 14296.8450276668  
209 14330.5128270185  
210 14545.6359009634  
211 14586.8958936971  
212 14808.9009353990  
213 14819.3322051958  
214 15025.0811405330  
215 15082.8080812843  
216 15263.5223942207  
217 15362.5731978434  
218 15537.3746383157  
219 15639.6934194634  
220 15827.3942824444  
221 15880.2255561546  
222 16064.5634164666  
223 16126.3177789069  
224 16315.0850755377  
225 16431.3386370545  
226 16609.7031716441  
227 16739.8656789505  
228 16918.1054786721  
229 17005.5504494410  
230 17091.1699062061  
231 17233.9693283708  
232 17388.5511399387  
233 17555.3730138982  
234 17712.1336399595  
235 17881.3572745770  
236 18041.6331698817  
237 18210.2098846887  
238 18375.8933031161  
239 18509.2599493366  
240 18595.3915097674  
241 18714.6140062616

242 18898.3398963929  
243 19057.6628700984  
244 19240.4292303888  
245 19404.9721370216  
246 19588.6263723779  
247 19756.4880387738  
248 19941.5356499486  
249 20112.1740030796  
250 20237.9151282537  
251 20298.8502901512  
252 20472.1113005549  
253 20660.3739224054  
254 20836.1359176645  
255 21026.1528496998  
256 21204.2846204868  
257 21396.0137500912  
258 21576.5562989064  
259 21770.0498638758  
260 21952.9989444503  
261 22147.9231620144  
262 22333.4410950007  
263 22526.2014673692  
264 22611.8205183616  
265 22718.1814028619  
266 22919.1759544235  
267 23106.8745016562  
268 23308.8820208841  
269 23499.7636970474  
270 23703.7570962435  
271 23896.7837732957  
272 24102.4888840156  
273 24297.4278221647  
274 24505.6450992987  
275 24702.9972200811  
276 24912.9092833141  
277 25112.1053345851  
278 25322.8110779564  
279 25526.1773064673  
280 25738.9095605420  
281 25916.0275562505  
282 25950.8327193693  
283 26158.2525337302  
284 26363.9008667579  
285 26584.9358628153  
286 26788.8750689949  
287 27013.1888975162  
288 27218.6972744889  
289 27436.4305547991  
290 27660.3258590643  
291 27868.5769300551  
292 28101.7613760949



|     |                  |
|-----|------------------|
| 293 | 28306.3516911493 |
| 294 | 28528.9866979950 |
| 295 | 28770.6739719006 |
| 296 | 28959.7391625601 |
| 297 | 29234.8490697548 |
| 298 | 29408.3302693025 |
| 299 | 29644.2337736750 |
| 300 | 29888.4527003048 |
| 301 | 30052.8611104257 |
| 302 | 30386.7657640245 |
